# Supplementary material
Source: PubMed Central journal article supplement (PMC4684991)
Supplement: NIHMS734913-supplement-1.pdf [file NIHMS734913-supplement-1.pdf]

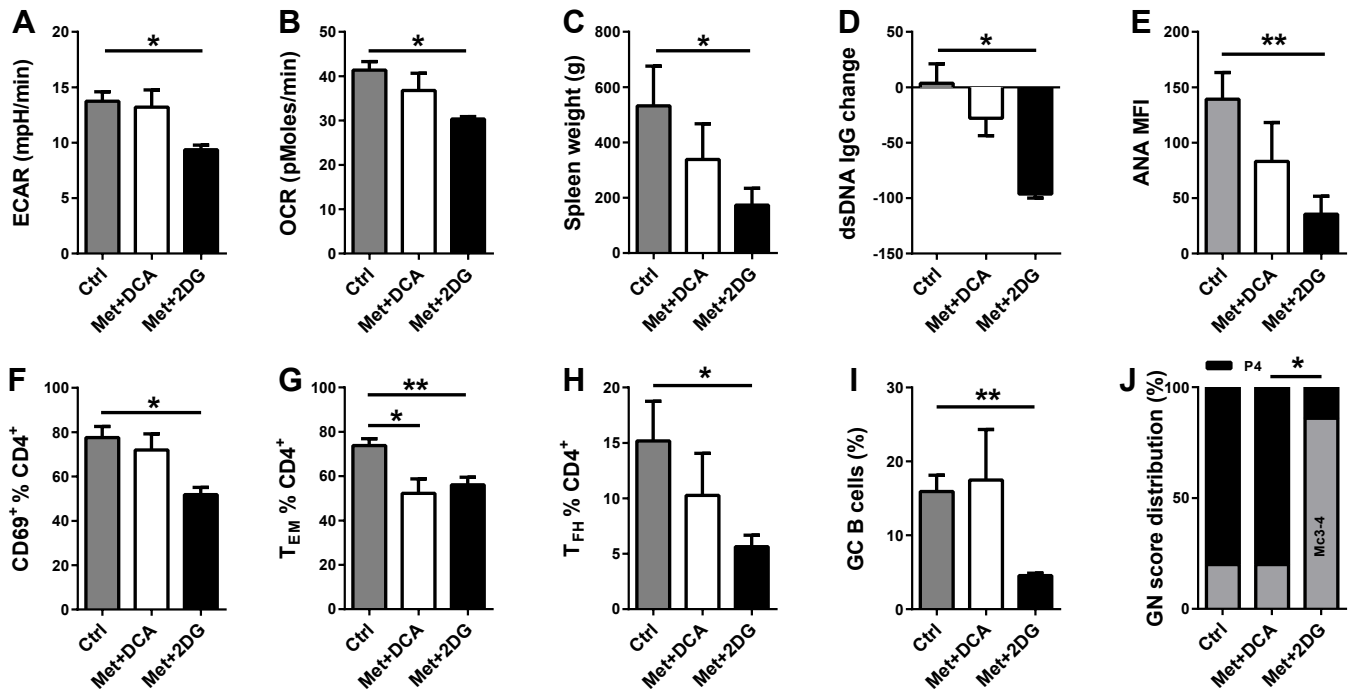

**Sup. Figure 1. Met+DCA treatment did not reverse disease.** 8-month old TC mice were treated with Met+DCA or Met+2DG for 8 weeks, when analysis was performed. Basal ECAR ( **A** ) and OCR ( **B** ) in CD4<sup>+</sup> T cells. **C**. Splenocyte numbers. **D**. Changes in serum anti -dsDNA IgG levels after 8 weeks of treatment. **E**. ANA levels measured as MFI in terminal sera. Percentage of CD69<sup>+</sup> ( **F** ), T<sub>EM</sub> ( **G** ), T<sub>FH</sub> ( **H** ) CD4<sup>+</sup> T cells. **I**. Percentage of GC B220<sup>+</sup> B cells. **J**. GN score distribution: P4: proliferative GN s core 4; Mc3-4: Mesangial cellular score 3 and 4. N = 5 -10 per group. \* *p* < 0.05, \*\* *p* < 0.01.
